# Supplementary material for: Transcriptional Regulation and Protein Localization of Zip10, Zip13 and Zip14 Transporters of Freshwater Teleost Yellow Catfish Pelteobagrus fulvidraco Following Zn Exposure in a Heterologous HEK293T Model
Source: MDPI journal article supplement (doi:10.3390/ijms23148034), 2022-07-21
Supplement: s1 [file s1]

**Table S1.** Nested PCR primers used for the cloning of *zip10*, *zip13* and *zip14* promoters of *Pelteobagrus fulvidraco*

| Genes        | Group              | Forward primer (5'-3')                                        | Reverse primer (5'-3')                               |
|--------------|--------------------|---------------------------------------------------------------|------------------------------------------------------|
| <i>zip10</i> | <sup>1</sup> PCR-1 | ACCTTTTAAGTGAAAATTGTGCT                                       | AGTGTGTGAAAACAAAATCGC                                |
|              | <sup>2</sup> PCR-2 | <sup>3</sup> ctatcgataggtaccgagctcATCAATCGGTCCT<br>CTGTGAACAG | cagtaccggaatgccaagcttCATTCACCAACTGT<br>GTTTACGCG     |
| <i>zip13</i> | PCR-1              | TTTACACTGGTTAAATATAGGCTT                                      | TTTGATTTGTTTGCCTTACCTCA                              |
|              | PCR-2              | ctatcgataggtaccgagctcATATAACCAGGTG<br>ACCAATCATCAGT           | cagtaccggaatgccaagcttTTTGATTTGTTTGCC<br>TTACCTCAA    |
| <i>zip14</i> | PCR-1              | TTGGAAACTTATAGAATGTGCTT                                       | GCACATCTACAATTCTTTTATCGT                             |
|              | PCR-2              | ctatcgataggtaccgagctcGTCACGGACGTTAA<br>AACAACACA              | cagtaccggaatgccaagcttCTTTTATCGTACCTC<br>ATTATCCGTAAC |

- 1: The first group of primers used for nested PCR.
- 2: The second group promoters used for nested PCR.
- 3: The part of “uppercase” are primers to generated promoter sequence, the part of “lowercase” are primers assisting to generate recombination sequence to subcloned to pGL3-basic plasmid.

**Table S2.** PCR Primers used for 5'-deletion promoter plasmids construction of *zip10*, *zip13* and *zip14* of *Pelteobagrus fulvidraco*

| Gene         | Primers        | Forward primer (5'-3')                                | Reverse primer (5'-3')                         |
|--------------|----------------|-------------------------------------------------------|------------------------------------------------|
| <i>zip10</i> | pGL3-1767/+96  | 5'taccgagctCGAACTTCTCAGGTCACGG<br>GGAGC               | cagtaccggaatgccaaagcttGGCAAAGTTTCC<br>ACACGGAA |
|              | pGL3-1228/+96  | ctatcgataggtaccgagctcGGTTGTGTATAA<br>ATGCCAATGCA      | cagtaccggaatgccaaagcttGGCAAAGTTTCC<br>ACACGGAA |
|              | pGL3-992/+96   | ctatcgataggtaccgagctcACACAGCTACT<br>GAATTCCAGTACGTC   | cagtaccggaatgccaaagcttGGCAAAGTTTCC<br>ACACGGAA |
|              | pGL3-262/+96   | ctatcgataggtaccgagctcTGCATGAAGTA<br>ACATTTATAGCATTTG  | cagtaccggaatgccaaagcttGGCAAAGTTTCC<br>ACACGGAA |
| <i>zip13</i> | pGL3-1279/+64  | ctcGCATGCATCTTGCTTAAATGTGTA<br>TAGTCC                 | aagcaagatgcatgcGAGCTCGGTACCTATC<br>GATAGAGAA   |
|              | pGL3-861/+64   | ggtaccgagctcACTTATACTACAGGCTA<br>ATGTCTAATGAATTAC     | ataagtGAGCTCGGTACCTATCGATAGA<br>GAAAT          |
|              | pGL3-489/+64   | gataggtaccgagctcTTATATAATAATCAT<br>GAAATACATTTGTTCTGA | aaGAGCTCGGTACCTATCGATAGAGA<br>AATGTTC          |
|              | pGL3-295/+64   | GCTAGGAGGGAAGTAGAATTTTCAGT<br>TACTTCAT                | ttctacttcctcctagcGAGCTCGGTACCTATC<br>GATAGAGAA |
| <i>zip14</i> | pGL3-1409/+135 | aggtaccgTTGTTAGTGGACTGTAATGT<br>CACTGC                | ccactaaciaaCGGTACCTATCGATAGAGA<br>AATGTTC      |
|              | pGL3-1153/+135 | ataggtaccgCTCTGTCAGTCCGTCTGTC<br>TCTCC                | tgacagaGCGGTACCTATCGATAGAGAA<br>ATGTTC         |
|              | pGL3-654/+135  | cgataggtaccgAAGACTTTATTACTTTGT<br>TATAAGACACAAGTATG   | agtcttCGGTACCTATCGATAGAGAAAT<br>GTTCT          |
|              | pGL3-266/+135  | gtaccgGCTGCGTTAAAAGACTAAAA<br>AGTAATATT               | ttttaacgcagcCGGTACCTATCGATAGAGA<br>AATGTTC     |

- 5: The part of “uppercase” are primers to generate 5' unidirectional deletion promoter sequence and pGL3-basic sequence using full-length promoters constructs as template, the part of “lowercase” are primers assisting to generate recombination sequence to recombine the produced deletion sequence and pGL3-basic sequence.

**Table S3.** Nested PCR primers used for the generating of pZip10-EGFP, pZip13-EGFP and pZip14-EGFP of *Pelteobagrus fulvidraco*

| Genes       | Group | Forward primer (5'-3')                                  | Reverse primer (5'-3')                           |
|-------------|-------|---------------------------------------------------------|--------------------------------------------------|
| pZip10-EGFP | PCR-1 | AAAGGGGTTTTCCGGTGTGTAGGAC                               | ACTCCGCTATAGCAGAAAGCAG                           |
|             | PCR-2 | <sup>6</sup> ctagcgtttaacttaagcttATGGCAGGGAC<br>AAGCCGG | gctcacatggtggcctcgagACTCCGCTATAGC<br>AGAAAGCAGC  |
| pZip13-EGFP | PCR-1 | TACTGGCCTTAAAGCATTGGTCTCG                               | AGAAGTCGAAGTCGAACACAATGC                         |
|             | PCR-2 | ctagcgtttaacttaagcttATGAGAGTTCAC<br>GTTACACCAAG         | gctcacatggtggcctcgagAGAAGTCGAAGT<br>CGAACACAATGC |
| pZip14-EGFP | PCR-1 | TTCTCTGTGTTCTAGAGACATCGTT                               | ATCCGAGCTGTATCTGTCCTGAATA                        |
|             | PCR-2 | ctagcgtttaacttaagcttATGTTACGGATA<br>ATGAGATCCTACAGA     | gctcacatggtggcctcgagATCCGAGCTGTAT<br>CTGTCCTGAA  |

6: The part of “uppercase” are primers to generate cDNA sequence coding the corresponding protein, the part of “lowercase” are primers assisting to generate recombination sequence to subclone to pcDNA3.1-EGFP plasmid.

**Table S4.** Primers used for site-mutation analysis

| Gene         | Primers               | Forward primer (5'-3')                                       | Reverse primer (5'-3')                                      |
|--------------|-----------------------|--------------------------------------------------------------|-------------------------------------------------------------|
| <i>zip10</i> | MRE- <i>zip10</i>     | <sup>7</sup> CTTtctgttcagaacggAAAAAAAAAAAAAC<br>CTTTCACACCTT | TccgttctgaacagaAAGTCTGCTGTGAATTCA<br>ACCAGTT                |
| <i>zip13</i> | MRE- <i>zip13</i>     | AcacgtacagttcggcgAAACTTTGTAACGG<br>AACGAAAGG                 | TgccgaactgtacgtgTCCCTGAACCCACATA<br>TTCA                    |
|              | KLF4- <i>zip13</i>    | tttgcattggagTTTGGCATGTAATAAGTGAT<br>TATTTATATTT              | GCCAAActccatgcaaaTAATGCTTTATGTATC<br>CATGGGCT               |
| <i>zip14</i> | MRE- <i>zip14</i>     | cgccgaactggatgtgTTGTACGTGTCATATG<br>GTGTTATAAAGTG            | AAcacatccagttcggcgGGGCTTTATTATCTATA<br>TTCATAATATTTATATATTT |
|              | STAT(1)- <i>zip14</i> | agagagccggGATGTCATGTGTTTATTTCT<br>GAAAAGAT                   | ATGACATCccggctctctGCAGTGACATTACA<br>GTCCACTAACAA            |
|              | STAT(2)- <i>zip14</i> | GTTTAagaggctcgtcATTATTCTGTTATTC<br>TCGTATGTTAGCAGC           | TgacgagcctctTAAACACATGACATCTGACA<br>GGAAAG                  |

7: The part of “lowercase” are mutated unspecific binding sequence which was substituted according to Jaspar, the part of “uppercase” are sequence beside the predicted binding sequence.

**Table S5.** Primers used for electrophoretic mobility-shift assay (EMSA)

| Primers                |                       | Forward primer (5'-3')                  | Reverse primer (5'-3')                  |
|------------------------|-----------------------|-----------------------------------------|-----------------------------------------|
| MRE- <i>zip10</i>      | Biotin-probe          | Biotin-<br>CTTGTGACTTGTGAAAAAAA         | Biotin-<br>TTTTTTTCACAAGTCACAAG         |
|                        | Unspecific-competitor | CTTTCTGTTTCAGAACGGAAA                   | TTTCCGTTCTGAACAGAAAG                    |
| MRE- <i>zip13</i>      | Biotin-probe          | Biotin-<br>GGGAAATGAGTGTGCAACACA<br>AAC | Biotin-<br>GTTTGTGTTGCACACTCATTTC<br>CC |
|                        | Unspecific-competitor | GCCCCACGTACAGTTCGGCGGT<br>TT            | AAACCGCCGAACTGTACGTG<br>GGGC            |
| MRE- <i>zip14</i>      | Biotin-Probe          | Biotin-<br>GCCCTATTTGCACAGGGTTAGT<br>TT | Biotin-<br>AAACTAACCCTGTGCAAATAG<br>GGC |
|                        | Unspecific-competitor | GCCCCGCCGAACTGGATGTGGT<br>TT            | AAACCACATCCAGTTCGGCGG<br>GGC            |
| KLF4- <i>zip13</i>     | Biotin-probe          | Biotin-<br>GTACAGATGCACACTGTCATGC       | Biotin-<br>GCATGACAGTGTGCATCTGTA<br>C   |
|                        | Unspecific-competitor | GTATCACGATCAGTGAGTCTGC                  | GCAGACTCACTGATCGTGATA<br>C              |
| STAT3(1)- <i>zip14</i> | Biotin-probe          | Biotin-<br>ACTGCTTTCCTGTCAGATGT         | Biotin-<br>ACATCTGACAGGAAAGCAGT         |
|                        | Unspecific-competitor | ACTGCAGAGAGCCGGGATGT                    | ACATCCCGGCTCTCTGCAGT                    |

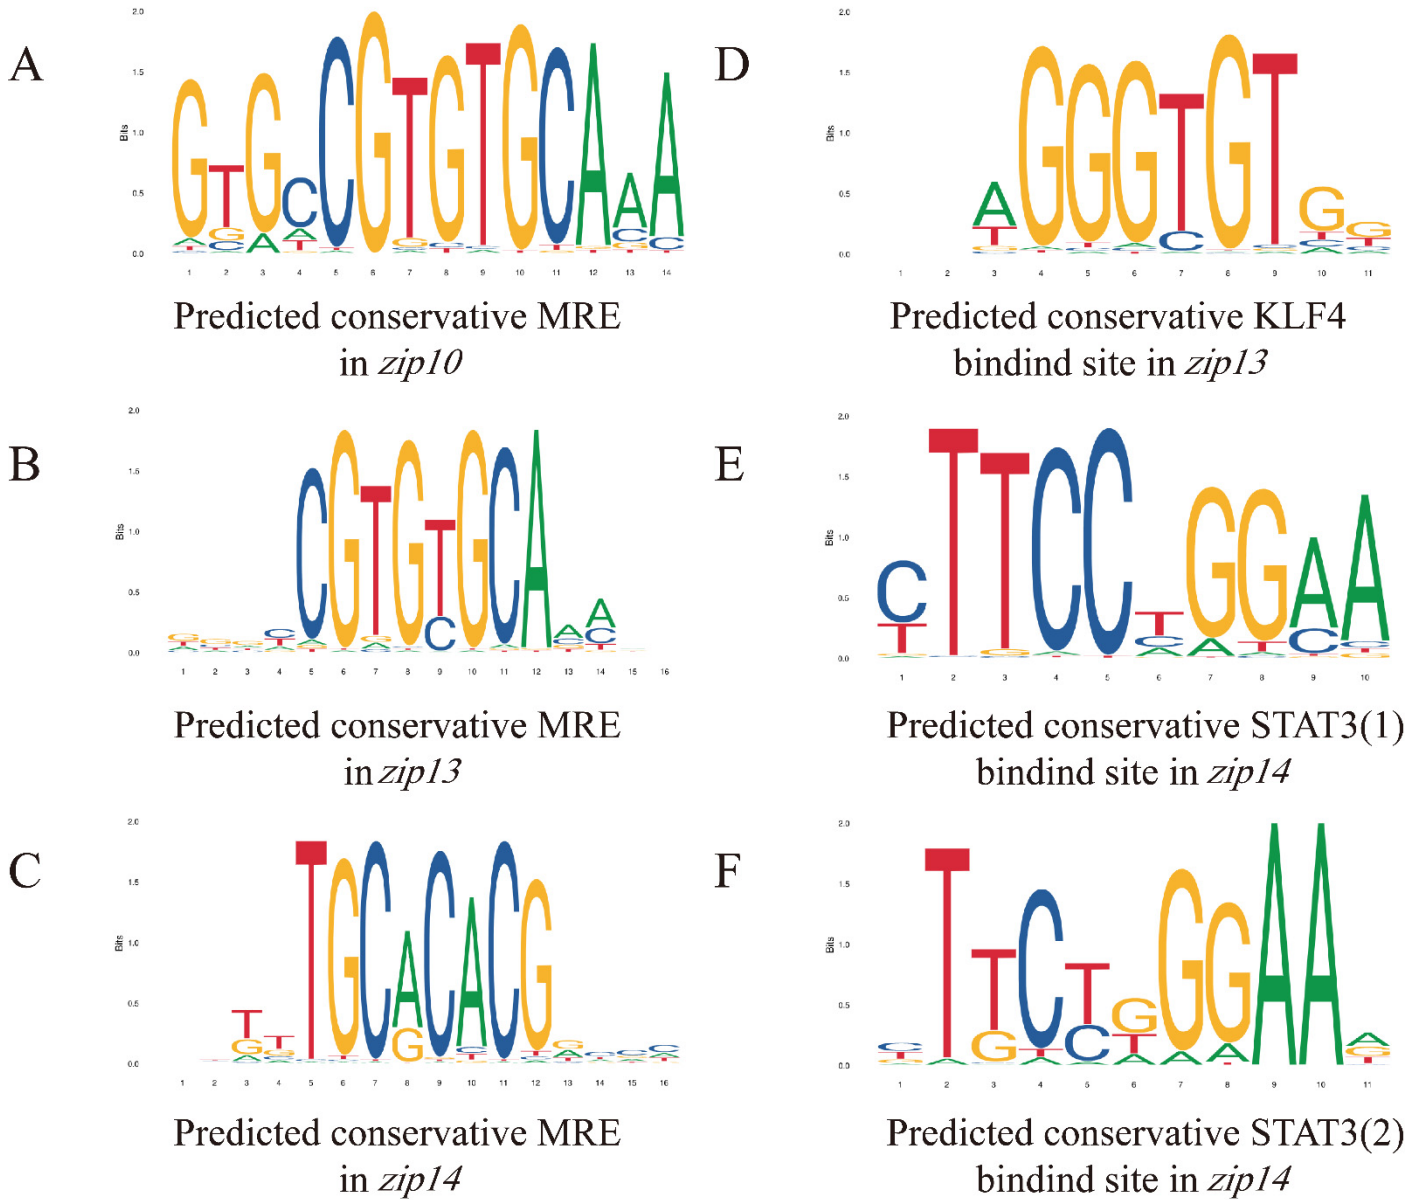

**Figure S1.** The sequences of the selected predicted TFBSs in *zip10*, *zip13* and *zip14* promoter of *P. fulvidraco*. The bigger a deoxynucleotide is, the more conservative a deoxynucleotide among vertebrates. Different color are only used to distinguish different deoxynucleotide. (A) Predicted conservative MRE of *zip10*; (B) predicted conservative MRE of *zip13*; (C) Predicted conservative MRE of *zip14*; (D) Predicted conservative KLF4 binding site of *zip13*; (E) predicted conservative STAT3(1) bind site of *zip14*; (F) Predicted conservative STAT3(2) bind site of *zip14*.
